# Supplementary material for: Vegfa/vegfr2 signaling is necessary for zebrafish islet vessel development, but is dispensable for beta-cell and alpha-cell formation
Source: PubMed Central journal article supplement (PMC6401103; doi:10.1038/s41598-019-40136-1), 2019-03-05
Supplement: 41598_2019_40136_MOESM1_ESM.pdf [file 41598_2019_40136_MOESM1_ESM.pdf]

## **Supplementary Information**

**Vegfa/vegfr2 signaling is necessary for zebrafish islet vessel development, but is dispensable for beta- and alpha-cell formation**

**Chiara M. Toselli<sup>1</sup>, Brayden M. Wilkinson<sup>1</sup>, Joshua Paterson<sup>1</sup>, Timothy J. Kieffer<sup>1,2\*</sup>**

<sup>1</sup> Department of Cellular and Physiological Sciences, Life Sciences Institute, University of British Columbia, Vancouver, BC V6T 1Z3, Canada

<sup>2</sup> Department of Surgery, Life Sciences Institute, University of British Columbia, Vancouver, BC V6T 1Z3, Canada

\* Corresponding Author: Timothy J. Kieffer (e-mail: [tim.kieffer@ubc.ca](mailto:tim.kieffer@ubc.ca))

*Tg(fli1:EGFP; insa:tagRFP)*

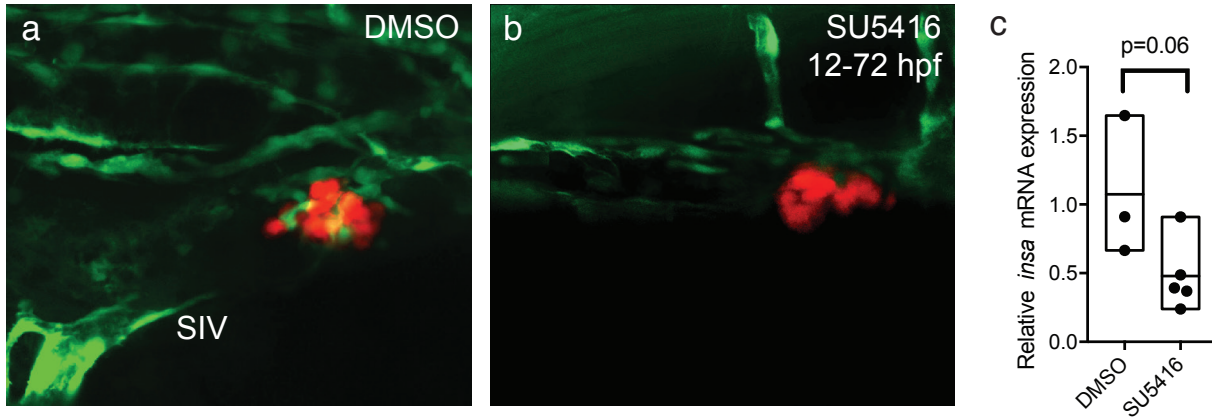

**Supplemental Figure 1:** Sub-intestinal vein fails to form in SU5416-treated embryos. (a-b) Confocal projections of 72 hpf *Tg(fli1:EGFP; insa:tagRFP)* embryos treated with DMSO or SU5416; endothelial cells (green) and beta-cells (red). SIV = sub-intestinal vein. (c) Relative expression of *insa* in isolated beta-cells of DMSO-treated and SU5416-treated *Tg(fli1:EGFP; insa:tagRFP)* embryos at 72 hpf. All values were normalized to *ef1a*.

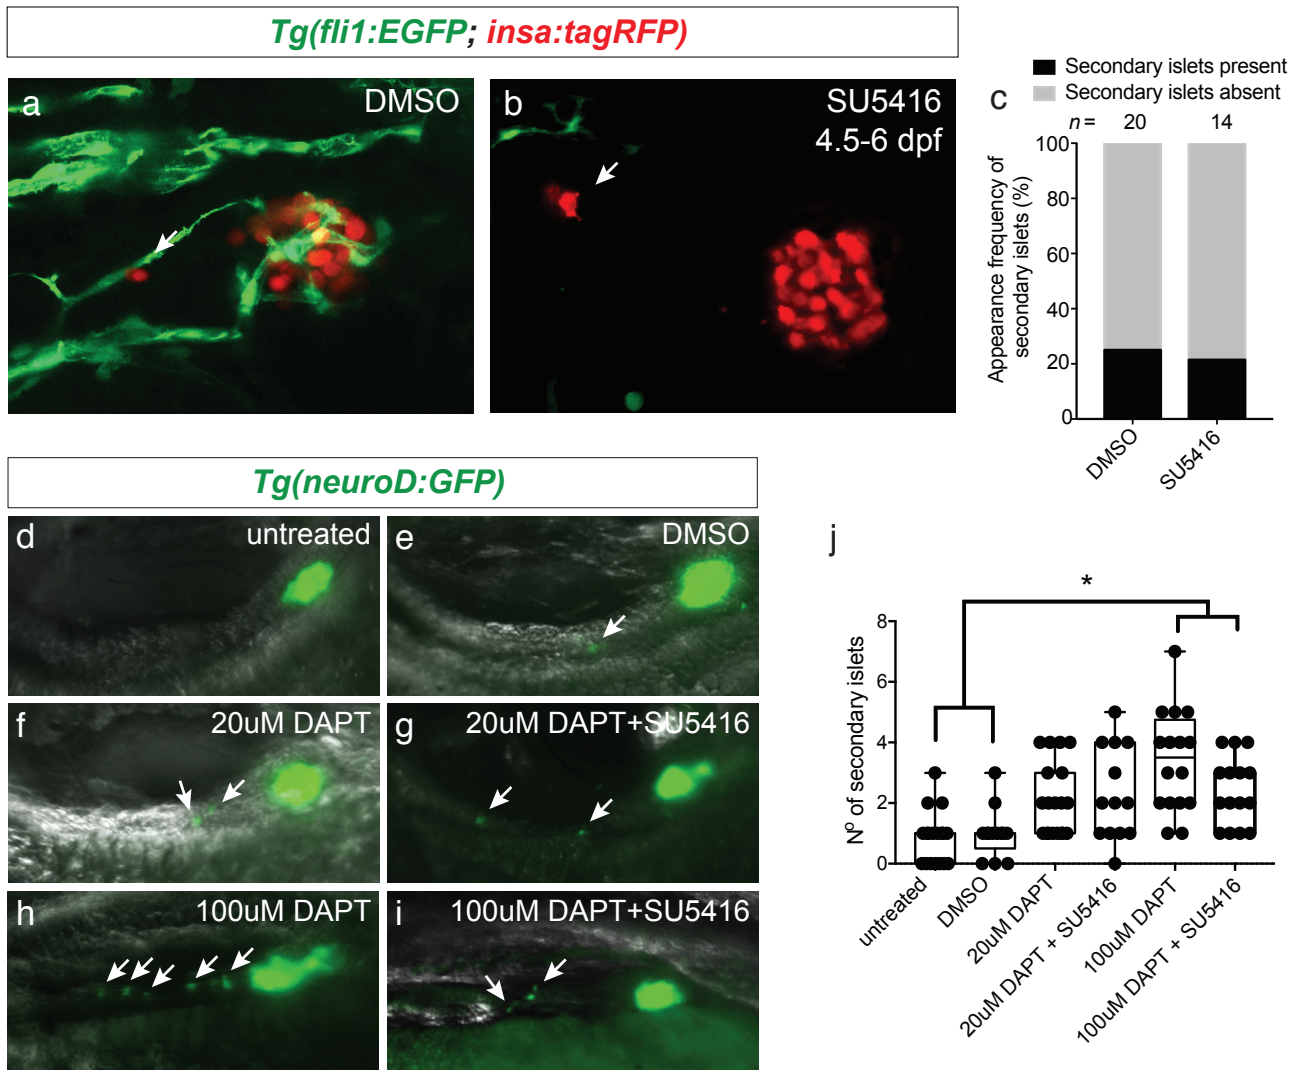

**Supplemental Figure 2:** Secondary islets form in SU5416-treated fish. **(a-b)** Confocal projections of 6 dpf *Tg(fli1:EGFP; insa:tagRFP)* zebrafish treated with DMSO or SU5416 from 4.5 dpf until 6 dpf. White arrowheads indicate secondary islets; endothelial cells (green) and beta-cells (red). **(c)** Frequency of secondary islets in 6 dpf *Tg(fli1:EGFP; insa:tagRFP)* zebrafish treated with DMSO or SU5416 from 4.5 dpf until 6 dpf. n=14-20. **(d-i)** Images of *Tg(neuroD:GFP)* untreated, DMSO-treated, DAPT-treated, or DAPT and SU5416-treated embryos from 3 until 4.5 dpf. White arrowheads indicate secondary islets. **(j)** The number of secondary islets in untreated, DMSO-treated, DAPT-treated, or DAPT and SU5416-treated embryos. Box-and-whisker plots show median, and circles represent individual zebrafish. n=13-19. \*p < 0.05 by one-way ANOVA and Tukey post-hoc test.

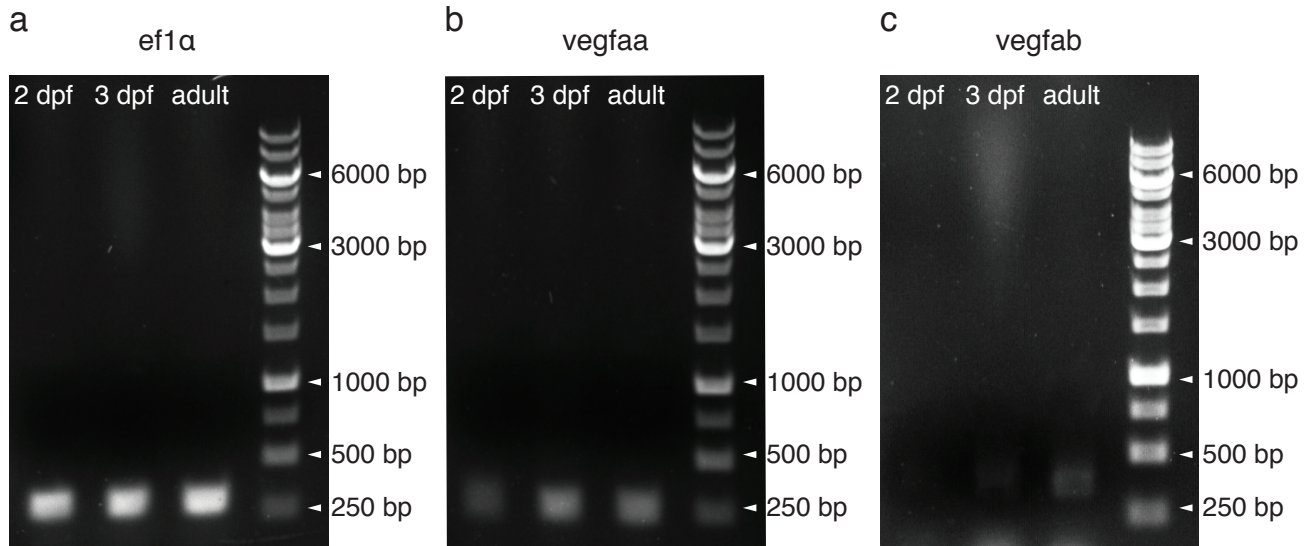

**Supplemental Figure 3:** Vegfaa and Vegfab expression in 2 dpf, 3 dpf, and adult beta-cells. (a-c) RT-PCR of (a) *ef1α*, (b) *vegfaa*, and (c) *vegfab* on sorted 2 dpf, 3 dpf, and adult beta-cells.

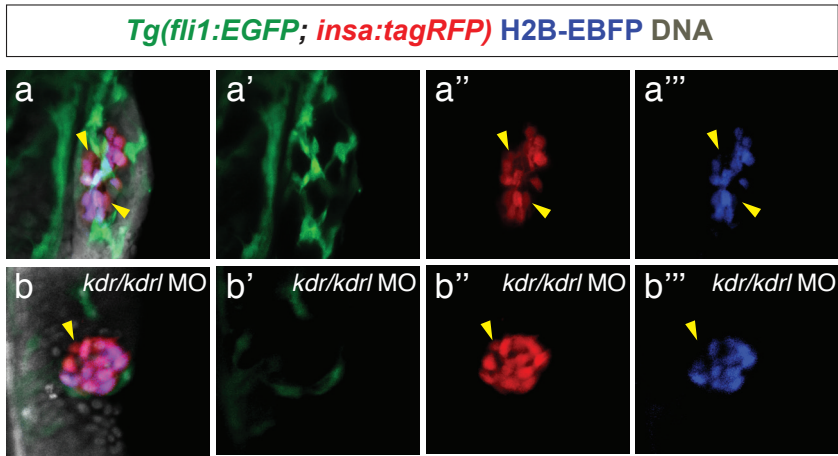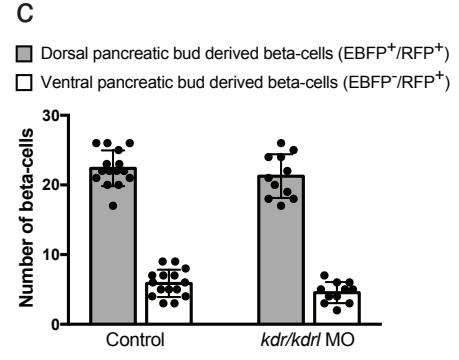

**Supplemental Figure 4:** Beta-cells derived from the dorsal and ventral pancreatic bud are present in *kdr/kdr1* injected zebrafish. (a-b''') Confocal projections of 72 hpf *Tg(fli1:EGFP; insa:tagRFP)* embryos (a-a''') injected with H2B-EBFP mRNA or (b-b''') co-injected with H2B-EBFP mRNA and *kdr/kdr1* morpholino; endothelial cells (green), beta-cells (red), dorsal pancreatic bud derived beta-cells (blue), and TO-PRO-3 nuclear stain (DNA; grey). Yellow arrowheads indicate beta-cells derived from the ventral pancreatic bud (H2B-EBFP<sup>-</sup>/RFP<sup>+</sup>). (c) The number of beta-cell derived from the dorsal pancreatic bud (H2B-EBFP<sup>+</sup>/RFP<sup>+</sup>) and ventral pancreatic bud (H2B-EBFP<sup>-</sup>/RFP<sup>+</sup>) at 72 hpf. Bar plots show mean, and circles represent individual zebrafish. n=11-15.
